# Supplementary material for: Epigenetic Changes Associated with the Progression of Prion Disease in Syrian Hamsters (Mesocricetus auratus)
Source: Research Square preprint supplement (doi:10.21203/rs.3.rs-7850591/v1), 2025-10-21
Supplement: Supplementary file 2 [file faba7d9f5df7b8b98f249300.xlsx]

## Sheet: README
Supplementary Data - Epigenetic Changes Associated with the Progression of Prion Disease in Syrian Hamsters (Mesocricetus auratus) Lexi E. Frank1,2*, Nicole Flack1,2, Christopher Faulk3, Alyssa J. Block4, 5, Jason C. Bartz2,4, Peter A. Larsen1,2 1 Department of Veterinary and Biomedical Sciences, University of Minnesota, St. Paul, MN, U.S. 55108, 2 Minnesota Center for Prion Research and Outreach…
Here is the Gene Ontology Analysis for the prion infected hamster study of methylation and gene expression. Reference genome is the Mus musculus annotation mapped onto the Mesocricetus auratus genome, so gene names correspond to M. musculus. GO analysis was done on DAVID. Sheets include only significant (adjusted p-value < 0.05) GO terms (see FDR or Benjamini column for significance). By Lexi Fra…
DAVID
Sheets
All_significant_RNAseq	All significant GO terms from RNAseq analysis, broken up into upregulated and downregulated genes and GO terms.
All_significant_meth	All significant GO terms from CpG methylation analysis, broken into hypermethylated and hypomethylated genes and GO terms.
Headings from DAVID Output
Category	Term	Count	%	PValue	Genes	List Total	Pop Hits	Pop Total	Fold Enrichment	Bonferroni	Benjamini	FDR
Biological Processes	Gene ontology number and term name	total # of genes contributing to term	percentage (involved genes/total)	EASE Score, a Modified Fisher Exact P-value	list of genes contributing to that GO term from the data	total # of genes in the set	Related to the background gene set, can be ignored for this data	Related to the background gene set, can be ignored for this data	how much enrichment for this term	Bonferroni correction	Benjamini hochberg correction	False Discovery Rate
					rnaseq data has refseq RNA idenfier and Methylation data has entrez ID number					Adjustments for mutliple hypothesis testing, use one of these instead of the pvalue column for significance.

## Sheet: All_significant_meth
Hyper/Hypomethylation	Timepoint	Category	Term	Count	%	PValue	Genes	List Total	Pop Hits	Pop Total	Fold Enrichment	Bonferroni	Benjamini	FDR
Hyper	80	GOTERM_BP_DIRECT	GO:0007399~nervous system development	24	3.10881	3.78e-08	21413, 70127, 20356, 66993, 93686, 21960, 14573, 70892, 18189, 338352, 268859, 110789, 18191, 79221, 14805, 13869, 269784, 11682, 216858, 14586, 214968, 18227, 269275, 12622	567	311	29775	4.05247	0.000104	0.000104	0.000102
Hyper	80	GOTERM_BP_DIRECT	GO:0048013~ephrin receptor signaling pathway	12	1.5544	1.51e-07	18212, 108699, 18214, 77531, 13869, 268996, 16001, 13841, 11682, 217692, 13640, 21844	567	74	29775	8.51566	0.000413	0.000165	0.000162
Hyper	80	GOTERM_BP_DIRECT	GO:0007165~signal transduction	44	5.69948	1.81e-07	23966, 14394, 380924, 243653, 15245, 12571, 110784, 71544, 208650, 19283, 26931, 20315, 23964, 56392, 23965, 13869, 59027, 29863, 50791, 117600, 53603, 110197, 14119, 14118, 241489, 238871, 108699, 70425, 69993, 14783, 18189, 19274, 56044, 22367, 19270, 11735, 50540, 76117, 53416, 18749, 104248, 231532, 242083, 12326	567	951	29775	2.42963	0.000496	0.000165	0.000162
Hyper	80	GOTERM_BP_DIRECT	GO:0007411~axon guidance	18	2.33161	3.47e-07	18212, 20356, 268902, 19699, 18187, 114873, 17260, 20315, 11735, 13508, 57764, 269784, 13841, 13640, 30957, 105689, 214968, 18997	567	201	29775	4.70268	0.000952	0.000238	0.000233
Hyper	80	GOTERM_BP_DIRECT	GO:0050808~synapse organization	12	1.5544	8.08e-07	11735, 268902, 21960, 243499, 16795, 18189, 26422, 20617, 18163, 26875, 18191, 11820	567	87	29775	7.2432	0.0022147	0.000443	0.000434
Hyper	80	GOTERM_BP_DIRECT	GO:0007269~neurotransmitter secretion	8	1.03627	2.4e-06	20983, 18189, 20617, 20979, 20616, 320127, 18191, 116837	567	33	29775	12.7305	0.00657845	0.000925	0.000906
Hyper	80	GOTERM_BP_DIRECT	GO:0030198~extracellular matrix organization	16	2.07254	2.67e-06	21960, 71355, 23794, 114249, 12829, 229389, 21907, 12817, 12828, 234356, 233332, 382864, 213945, 77739, 64074, 11820	567	184	29775	4.56637	0.00729864	0.000925	0.000906
Hyper	80	GOTERM_BP_DIRECT	GO:0007420~brain development	18	2.33161	2.7e-06	268902, 17268, 72899, 19699, 93757, 16795, 104001, 16001, 114873, 20315, 252973, 21907, 269784, 11682, 13841, 67890, 320840, 235439	567	233	29775	4.05682	0.00737178	0.000925	0.000906
Hyper	80	GOTERM_BP_DIRECT	GO:0007626~locomotory behavior	13	1.68394	6.37e-06	17268, 320790, 19699, 110784, 66797, 20273, 18390, 13508, 319924, 27386, 320840, 11994, 11820	567	128	29775	5.33337	0.0173223	0.00194156	0.00190124
Hyper	80	GOTERM_BP_DIRECT	GO:0007612~learning	10	1.29534	1.4e-05	66673, 18212, 19699, 66797, 18189, 11980, 18163, 22335, 18191, 11820	567	76	29775	6.90964	0.0376442	0.00382984	0.00375031
Hyper	80	GOTERM_BP_DIRECT	GO:0099171~presynaptic modulation of chemical synaptic transmission	9	1.1658	1.53e-05	14805, 319924, 110784, 18750, 11541, 320127, 18191, 18390, 108073	567	59	29775	8.01049	0.0412535	0.00382984	0.00375031
Hyper	80	GOTERM_BP_DIRECT	GO:0031175~neuron projection development	15	1.94301	1.81e-05	14573, 16001, 66797, 18189, 19283, 56471, 19274, 22367, 19270, 243725, 11839, 269784, 320840, 11820, 235439	567	190	29775	4.14578	0.0485114	0.00414393	0.00405788
Hyper	80	GOTERM_BP_DIRECT	GO:0006338~chromatin remodeling	37	4.79275	2.53e-05	20874, 75607, 18212, 66993, 18214, 14051, 12495, 14013, 268996, 19283, 18195, 72391, 227674, 12638, 208727, 13869, 77976, 13841, 11682, 15468, 70127, 18004, 320790, 70425, 674895, 23938, 16001, 19274, 22367, 19270, 29871, 230661, 333050, 117599, 53416, 30955, 242083	567	897	29775	2.1661	0.0670813	0.00534126	0.00523035
Hyper	80	GOTERM_BP_DIRECT	GO:0006974~DNA damage response	20	2.59067	3.03e-05	68995, 18004, 72899, 12571, 93757, 218793, 12043, 71991, 73472, 22367, 22401, 72391, 224008, 56469, 268281, 117599, 12454, 77976, 50754, 17314	567	338	29775	3.10729	0.0797865	0.00593916	0.00581584
Hyper	80	GOTERM_BP_DIRECT	GO:0007155~cell adhesion	25	3.23834	3.35e-05	380924, 66797, 18750, 636808, 114249, 18191, 116731, 77976, 230959, 235106, 11820, 72823, 17311, 19699, 78092, 29817, 13518, 252973, 12828, 54725, 269784, 239857, 213945, 11994, 18526	567	496	29775	2.64684	0.0877991	0.00612623	0.00599902
Hyper	80	GOTERM_BP_DIRECT	GO:0007156~homophilic cell adhesion via plasma membrane adhesion molecules	14	1.81347	3.7e-05	18212, 268902, 215654, 114873, 19274, 270120, 23965, 13508, 116731, 54725, 239857, 12565, 11994, 18526	567	177	29775	4.15359	0.0965992	0.0063492	0.00621735
Hyper	80	GOTERM_BP_DIRECT	GO:0050885~neuromuscular process controlling balance	9	1.1658	3.95e-05	93686, 21960, 16531, 18189, 18997, 268859, 20512, 11820, 235439	567	67	29775	7.05402	0.102811	0.00638159	0.00624907
Hyper	80	GOTERM_BP_DIRECT	GO:0043393~regulation of protein binding	7	0.906736	5.51e-05	66993, 13508, 102633923, 208727, 16795, 208650, 11820	567	36	29775	10.2109	0.140388	0.00840387	0.00822936
Hyper	80	GOTERM_BP_DIRECT	GO:0034329~cell junction assembly	5	0.647668	8.06e-05	252973, 66797, 18189, 270163, 18191	567	13	29775	20.1974	0.198477	0.0111599	0.0109281
Hyper	80	GOTERM_BP_DIRECT	GO:0048666~neuron development	9	1.1658	8.13e-05	23966, 30928, 110197, 20616, 17260, 270120, 13405, 23964, 23965	567	74	29775	6.38674	0.20005	0.0111599	0.0109281
Hyper	80	GOTERM_BP_DIRECT	GO:0007265~Ras protein signal transduction	9	1.1658	8.95e-05	19731, 78255, 17311, 333050, 74754, 320127, 56044, 19418, 217944	567	75	29775	6.30159	0.217883	0.0117019	0.0114589
Hyper	80	GOTERM_BP_DIRECT	GO:0014051~gamma-aminobutyric acid secretion	4	0.518135	0.000131	14805, 319924, 22066, 12298	567	6	29775	35.0088	0.301941	0.0163376	0.0159984
Hyper	80	GOTERM_BP_DIRECT	GO:0048009~insulin-like growth factor receptor signaling pathway	9	1.1658	0.000155	18212, 18214, 13869, 16367, 23938, 14783, 16001, 13841, 11682	567	81	29775	5.8348	0.345714	0.0184425	0.0180595
Hyper	80	GOTERM_BP_DIRECT	GO:0030534~adult behavior	7	0.906736	0.000199	14805, 217843, 66797, 18189, 11682, 18191, 108073	567	45	29775	8.16872	0.421566	0.0228074	0.0223338
Hyper	80	GOTERM_BP_DIRECT	GO:0007268~chemical synaptic transmission	12	1.5544	0.000219	319924, 16531, 16795, 15562, 66797, 18189, 20617, 12298, 20616, 22335, 18191, 108073	567	157	29775	4.01375	0.451797	0.0238256	0.0233309
Hyper	80	GOTERM_BP_DIRECT	GO:0001662~behavioral fear response	7	0.906736	0.000226	382543, 17450, 16795, 21907, 12043, 22335, 108073	567	46	29775	7.99114	0.461806	0.0238256	0.0233309
Hyper	80	GOTERM_BP_DIRECT	GO:0010976~positive regulation of neuron projection development	13	1.68394	0.000288	18212, 18214, 19699, 18189, 19283, 243725, 21844, 56392, 23965, 50791, 242274, 320840, 13405	567	189	29775	3.61202	0.547064	0.0293293	0.0287202
Hyper	80	GOTERM_BP_DIRECT	GO:0030182~neuron differentiation	15	1.94301	0.000382	18212, 16372, 14573, 104001, 12165, 12393, 17260, 79221, 21907, 216858, 15429, 18227, 18997, 56419, 11820	567	253	29775	3.11343	0.649426	0.0374279	0.0366507
Hyper	80	GOTERM_BP_DIRECT	GO:0035176~social behavior	8	1.03627	0.000476	13508, 14803, 21907, 66797, 18189, 320840, 18191, 18390	567	73	29775	5.75487	0.729631	0.0450916	0.0441552
Hyper	80	GOTERM_BP_DIRECT	GO:0043087~regulation of GTPase activity	7	0.906736	0.000494	18212, 108699, 208650, 217692, 13640, 320127, 21844	567	53	29775	6.93571	0.742712	0.0452407	0.0443013
Hypo	80	GOTERM_BP_DIRECT	GO:0007399~nervous system development	21	3.34928	2.69e-07	70127, 14270, 14172, 70892, 18760, 19266, 215690, 21419, 268859, 110789, 18191, 235281, 79221, 14805, 13869, 22360, 11682, 211323, 545156, 52897, 50758	490	311	29775	4.10312	0.000656	0.000656	0.000644
Hypo	80	GOTERM_BP_DIRECT	GO:0031175~neuron projection development	16	2.55183	6.58e-07	19645, 20187, 66797, 19272, 19274, 17096, 106042, 20404, 19270, 83767, 17828, 26420, 17967, 56839, 234267, 320840	490	190	29775	5.11708	0.0015996	0.000684	0.000672
Hypo	80	GOTERM_BP_DIRECT	GO:1990416~cellular response to brain-derived neurotrophic factor stimulus	6	0.956938	8.43e-07	18212, 83767, 18033, 20404, 14799, 14800	490	12	29775	30.3827	0.00204974	0.000684	0.000672
Hypo	80	GOTERM_BP_DIRECT	GO:0007165~signal transduction	37	5.90112	3.64e-06	23966, 14270, 14172, 71302, 18033, 19266, 259302, 22034, 23964, 23965, 76142, 55980, 13869, 50791, 277468, 243362, 11864, 238871, 19279, 50915, 69993, 14783, 19272, 19274, 225358, 109880, 19091, 19270, 637515, 12549, 232906, 170799, 26366, 211323, 14169, 14405, 12326	490	951	29775	2.36416	0.00882375	0.00221572	0.00217567
Hypo	80	GOTERM_BP_DIRECT	GO:0007156~homophilic cell adhesion via plasma membrane adhesion molecules	14	2.23285	8.04e-06	18212, 245827, 215654, 241201, 219257, 19274, 22138, 23965, 26563, 244682, 239857, 12565, 211712, 18526	490	177	29775	4.8063	0.0193749	0.003913	0.00384227
Hypo	80	GOTERM_BP_DIRECT	GO:0099560~synaptic membrane adhesion	7	1.11643	2.87e-05	23966, 19266, 12565, 211323, 245450, 241568, 23965	490	37	29775	11.4961	0.0675205	0.0116512	0.0114406
Hypo	80	GOTERM_BP_DIRECT	GO:0007169~cell surface receptor protein tyrosine kinase signaling pathway	10	1.5949	4.1e-05	18212, 13869, 20187, 26563, 16337, 11682, 320679, 211323, 17096, 11601	490	100	29775	6.07653	0.0948879	0.0142421	0.0139846
Hyper	120	GOTERM_BP_DIRECT	GO:0007156~homophilic cell adhesion via plasma membrane adhesion molecules	19	2.41423	2.53e-08	329628, 68764, 219228, 268902, 23836, 72333, 114873, 19274, 19281, 23965, 116731, 26563, 320865, 12554, 54216, 19713, 13723, 12558, 14107	606	177	29775	5.27424	7.39e-05	7.39e-05	7.26e-05
Hyper	120	GOTERM_BP_DIRECT	GO:0060078~regulation of postsynaptic membrane potential	10	1.27065	1.36e-07	14394, 14803, 14407, 16508, 52882, 24012, 14400, 14169, 105722, 14405	606	42	29775	11.6985	0.000399	0.0002	0.000196
Hyper	120	GOTERM_BP_DIRECT	GO:0000902~cell morphogenesis	16	2.03304	2.68e-07	17761, 18027, 23836, 15234, 110596, 13132, 66797, 19277, 20679, 22337, 11518, 320865, 12554, 211323, 12558, 320365	606	144	29775	5.4593	0.000782	0.000261	0.000256
Hyper	120	GOTERM_BP_DIRECT	GO:0050808~synapse organization	12	1.52478	1.54e-06	268902, 12405, 319387, 243499, 72333, 76787, 99633, 26875, 110648, 233977, 18191, 11820	606	87	29775	6.77706	0.00450301	0.00112829	0.00110862
Hyper	120	GOTERM_BP_DIRECT	GO:0007411~axon guidance	17	2.1601	3.99e-06	268902, 16574, 19277, 22253, 114873, 110648, 20315, 11658, 13848, 26563, 13840, 14432, 13640, 545156, 14026, 105689, 13723	606	201	29775	4.15558	0.0115992	0.0020455	0.00200983
Hyper	120	GOTERM_BP_DIRECT	GO:0001701~in utero embryonic development	23	2.92249	4.2e-06	108138, 19279, 17158, 320790, 67772, 13132, 14013, 94217, 12394, 66797, 30928, 22034, 11909, 22762, 74440, 20679, 20678, 225164, 11518, 11784, 11487, 19206, 56419	606	354	29775	3.1923	0.012198	0.0020455	0.00200983
Hyper	120	GOTERM_BP_DIRECT	GO:0099560~synaptic membrane adhesion	8	1.01652	8.38e-06	23966, 219228, 211323, 13640, 238205, 241568, 16180, 23965	606	37	29775	10.6235	0.0241994	0.0033821	0.00332313
Hyper	120	GOTERM_BP_DIRECT	GO:0045944~positive regulation of transcription by RNA polymerase II	51	6.4803	9.25e-06	14173, 14013, 17165, 12394, 22034, 22431, 69726, 16392, 225207, 56458, 234959, 50873, 12554, 11820, 15273, 18027, 18028, 13132, 23938, 244058, 30928, 11909, 22762, 80707, 22722, 230587, 231991, 252838, 18667, 194388, 19205, 19645, 17268, 214498, 14233, 108961, 64898, 110648, 20679, 22337, 18514, 19016, 240476, 108655, 320790, 67772, 19055, 226075, 21807, 14048, 216799	606	1282	29775	1.95462	0.0266941	0.0033821	0.00332313
Hyper	120	GOTERM_BP_DIRECT	GO:0007626~locomotory behavior	13	1.65184	1.24e-05	12290, 17268, 320790, 66797, 20273, 110648, 18390, 11804, 50873, 211323, 11784, 320840, 11820	606	128	29775	4.99014	0.0356003	0.00402769	0.00395746
Hyper	120	GOTERM_BP_DIRECT	GO:0098609~cell-cell adhesion	16	2.03304	2.3e-05	93742, 329628, 268902, 21873, 22329, 21872, 23859, 241035, 216033, 20315, 11829, 77739, 320840, 12558, 210126, 14107	606	206	29775	3.81621	0.0649665	0.00671721	0.00660009
Hyper	120	GOTERM_BP_DIRECT	GO:0007420~brain development	17	2.1601	2.55e-05	666173, 268902, 17268, 18028, 67772, 383619, 22253, 114873, 20679, 20315, 12826, 381694, 211323, 19206, 320840, 18514, 57815	606	233	29775	3.58486	0.071816	0.00677494	0.00665681
Hyper	120	GOTERM_BP_DIRECT	GO:0010976~positive regulation of neuron projection development	15	1.90597	3.53e-05	19205, 244667, 19242, 244058, 14362, 243725, 21844, 23965, 76089, 26563, 211323, 252838, 19713, 19317, 320840	606	189	29775	3.8995	0.098084	0.00860267	0.00845267
Hyper	120	GOTERM_BP_DIRECT	GO:0050804~modulation of chemical synaptic transmission	13	1.65184	5.64e-05	19242, 19055, 68942, 244310, 224997, 241568, 243725, 14805, 14803, 14807, 50873, 12558, 14800	606	149	29775	4.28683	0.152052	0.0126871	0.0124658
Hyper	120	GOTERM_BP_DIRECT	GO:0008285~negative regulation of cell population proliferation	22	2.79543	7.68e-05	19016, 14173, 19378, 110532, 19645, 214498, 20112, 12394, 65973, 19272, 22431, 20315, 22337, 54353, 76089, 12554, 210530, 211652, 19206, 244281, 11820, 50768	606	398	29775	2.71593	0.201108	0.0160372	0.0157576
Hyper	120	GOTERM_BP_DIRECT	GO:0016477~cell migration	19	2.41423	9.12e-05	14083, 23836, 239337, 72333, 216033, 19272, 17390, 21844, 23888, 320865, 12554, 211652, 214804, 329416, 12558, 71409, 103978, 54418, 14107	606	315	29775	2.96362	0.234216	0.0177895	0.0174793
Hyper	120	GOTERM_BP_DIRECT	GO:0007507~heart development	19	2.41423	0.000103	19016, 108655, 19378, 22329, 20112, 23938, 17390, 22431, 11909, 22762, 108154, 16392, 79221, 225164, 83675, 56376, 544696, 268396, 211323	606	318	29775	2.93566	0.259882	0.0180885	0.0177732
Hyper	120	GOTERM_BP_DIRECT	GO:0045197~establishment or maintenance of epithelial cell apical/basal polarity	6	0.762389	0.000105	72823, 93742, 23859, 68617, 14107, 243548	606	24	29775	12.2834	0.264733	0.0180885	0.0177732
Hyper	120	GOTERM_BP_DIRECT	GO:0006470~protein dephosphorylation	9	1.14358	0.000129	19279, 19249, 19055, 14049, 19272, 19274, 14048, 12234, 19281	606	74	29775	5.97572	0.313731	0.0209146	0.0205499
Hyper	120	GOTERM_BP_DIRECT	GO:0006897~endocytosis	14	1.77891	0.000141	13132, 20661, 94217, 66616, 74143, 29816, 20403, 22359, 225164, 383075, 57784, 329416, 11820, 103967	606	189	29775	3.63953	0.337467	0.0216661	0.0212884
Hyper	120	GOTERM_BP_DIRECT	GO:0048814~regulation of dendrite morphogenesis	6	0.762389	0.000157	210933, 329152, 665113, 217692, 64009, 211134	606	26	29775	11.3385	0.368862	0.0230097	0.0226086
Hyper	120	GOTERM_BP_DIRECT	GO:0043065~positive regulation of apoptotic process	21	2.66836	0.000224	19016, 110854, 19378, 20112, 19242, 22253, 17390, 338352, 65964, 74244, 22431, 29816, 56458, 76500, 21807, 50873, 11487, 105722, 107607, 11820, 14745	606	399	29775	2.58598	0.480162	0.0311508	0.0306076
Hyper	120	GOTERM_BP_DIRECT	GO:0045665~negative regulation of neuron differentiation	9	1.14358	0.000243	12704, 225164, 17268, 19205, 16392, 110648, 18514, 242748, 11820	606	81	29775	5.4593	0.50827	0.0322609	0.0316984
Hyper	120	GOTERM_BP_DIRECT	GO:0051963~regulation of synapse assembly	6	0.762389	0.000319	243499, 56376, 320840, 243725, 15569, 22359	606	30	29775	9.82673	0.606429	0.0405367	0.0398299
Hypo	120	GOTERM_BP_DIRECT	GO:0007156~homophilic cell adhesion via plasma membrane adhesion molecules	17	2.37099	1.19e-07	268902, 19876, 215654, 19274, 270120, 23965, 227485, 320865, 54725, 244682, 239857, 107934, 211712, 11994, 64085, 237979, 14107	528	177	29775	5.41619	0.000288	0.000288	0.000286
Hypo	120	GOTERM_BP_DIRECT	GO:0051965~positive regulation of synapse assembly	11	1.53417	1.89e-06	11418, 270190, 14804, 319387, 170757, 19266, 107934, 13640, 99633, 239250, 64085	528	82	29775	7.56479	0.00457032	0.00229039	0.00227524
Hypo	120	GOTERM_BP_DIRECT	GO:0007155~cell adhesion	24	3.34728	3.11e-05	72823, 69675, 50706, 240185, 66797, 19272, 18191, 27218, 83964, 12816, 54725, 13731, 244682, 17968, 239857, 12386, 12661, 16633, 18007, 211712, 17304, 11994, 268890, 13612	528	496	29775	2.72865	0.0724123	0.0221	0.0219537
Hypo	120	GOTERM_BP_DIRECT	GO:0099560~synaptic membrane adhesion	7	0.97629	4.36e-05	23966, 19266, 54725, 13640, 238205, 241568, 23965	528	37	29775	10.6688	0.100035	0.0221	0.0219537
Hypo	120	GOTERM_BP_DIRECT	GO:0048666~neuron development	9	1.25523	4.94e-05	110886, 23966, 18186, 22240, 14402, 270120, 23964, 14107, 23965	528	74	29775	6.85849	0.112649	0.0221	0.0219537
Hypo	120	GOTERM_BP_DIRECT	GO:1904862~inhibitory synapse assembly	6	0.83682	5.48e-05	110886, 14407, 14395, 66797, 14402, 64085	528	24	29775	14.098	0.124188	0.0221	0.0219537
Hypo	120	GOTERM_BP_DIRECT	GO:0001964~startle response	6	0.83682	6.76e-05	94109, 27386, 50873, 14812, 11994, 239250	528	25	29775	13.5341	0.150708	0.0233352	0.0231808
Hypo	120	GOTERM_BP_DIRECT	GO:0098609~cell-cell adhesion	14	1.95258	8.54e-05	268902, 19876, 270120, 23964, 54167, 11899, 83964, 59308, 107934, 12386, 18007, 77739, 320840, 14107	528	206	29775	3.83247	0.186503	0.0258006	0.0256298
Hyper	160	GOTERM_BP_DIRECT	GO:0007399~nervous system development	34	3.29138	6.82e-11	244667, 68955, 19266, 665113, 260315, 268859, 78286, 18191, 20358, 76089, 114255, 16974, 52897, 214968, 50758, 21413, 70127, 666173, 110876, 23859, 17295, 14585, 13131, 215690, 117606, 79221, 54126, 227541, 18507, 545156, 19713, 13853, 11479, 14107	834	311	29775	3.90305	2.6e-07	2.6e-07	2.56e-07
Hyper	160	GOTERM_BP_DIRECT	GO:0045944~positive regulation of transcription by RNA polymerase II	76	7.35721	1.56e-09	17126, 74117, 110784, 12394, 22034, 24136, 231051, 69726, 225207, 223701, 319974, 56458, 328572, 320878, 50873, 240690, 13009, 12753, 11865, 11545, 11820, 30942, 15273, 23857, 244579, 100072, 18028, 17295, 16364, 26401, 22762, 80707, 58208, 54169, 328365, 18507, 18986, 11477, 16449, 11479, 66277, 270118, 17268, 17984, 214498, 15364, 218772, 17187, 19883, 170826, 14390, 93691, 382066, 12454, 12013…	834	1282	29775	2.11647	5.95e-06	2.97e-06	2.93e-06
Hyper	160	GOTERM_BP_DIRECT	GO:0035556~intracellular signal transduction	37	3.5818	8.73e-09	328329, 17126, 15364, 208650, 65247, 66797, 665113, 225028, 217480, 219140, 78541, 224860, 14917, 117589, 232533, 56637, 14360, 71972, 269019, 20163, 18761, 13131, 70762, 13175, 26405, 226970, 52065, 54126, 277854, 12367, 545156, 320127, 67296, 17776, 432530, 217944, 12326	834	435	29775	3.03667	3.33e-05	1.11e-05	1.09e-05
Hyper	160	GOTERM_BP_DIRECT	GO:0006915~apoptotic process	40	3.87222	3.42e-07	12370, 70676, 17246, 21981, 218772, 68259, 236266, 22333, 20358, 58250, 11668, 56458, 210801, 66809, 59126, 66090, 328572, 16514, 68294, 18858, 14773, 320311, 13823, 14634, 11545, 26409, 15251, 244579, 66660, 67039, 114774, 72244, 74244, 67959, 208449, 58208, 76479, 12366, 12367, 15259	834	570	29775	2.50536	0.00130074	0.000253	0.000249
Hyper	160	GOTERM_BP_DIRECT	GO:0007507~heart development	28	2.71055	3.78e-07	12370, 17246, 66573, 17126, 19084, 83675, 328572, 320878, 16535, 13009, 14634, 14613, 14118, 108655, 108156, 14682, 22762, 108154, 79221, 20348, 77087, 68927, 12929, 12367, 16401, 14725, 11477, 56406	834	318	29775	3.14352	0.00143773	0.000253	0.000249
Hyper	160	GOTERM_BP_DIRECT	GO:0007409~axonogenesis	17	1.64569	3.98e-07	238880, 14083, 17984, 74018, 16001, 13131, 66797, 13175, 93691, 13518, 11735, 58208, 545156, 432530, 56637, 78808, 11820	834	124	29775	4.89455	0.00151409	0.000253	0.000249
Hyper	160	GOTERM_BP_DIRECT	GO:0001764~neuron migration	18	1.7425	1.35e-06	18212, 14360, 14083, 244667, 17984, 19699, 17295, 13131, 13175, 215690, 20745, 319974, 20358, 223701, 76089, 12929, 56079, 212712	834	152	29775	4.2278	0.00513874	0.000736	0.000724
Hyper	160	GOTERM_BP_DIRECT	GO:0008283~cell population proliferation	26	2.51694	2.42e-06	105670, 17126, 15364, 218772, 68259, 66797, 225523, 56710, 116871, 15400, 218506, 18514, 14634, 18028, 668158, 20449, 21417, 16160, 545291, 26563, 77987, 381126, 68083, 12226, 14725, 17535	834	309	29775	3.004	0.00917333	0.00115196	0.00113382
Hyper	160	GOTERM_BP_DIRECT	GO:0006338~chromatin remodeling	51	4.93708	3.59e-06	328329, 18212, 19266, 231051, 230674, 59126, 328572, 232533, 12753, 70127, 17295, 269019, 16001, 70762, 16364, 13175, 19274, 77987, 545156, 108829, 19713, 17776, 13853, 71586, 19046, 665113, 225028, 81703, 72391, 19281, 116871, 77976, 245000, 13548, 13666, 14360, 14083, 320790, 19055, 239985, 12660, 74302, 67857, 72162, 226751, 140780, 333050, 15259, 212712, 14048, 57815	834	897	29775	2.02985	0.01358	0.00128556	0.00126532
Hyper	160	GOTERM_BP_DIRECT	GO:0043066~negative regulation of apoptotic process	41	3.96902	3.79e-06	17246, 20750, 214498, 15245, 241035, 15364, 208650, 22333, 20658, 58250, 56379, 56458, 360013, 14773, 56637, 13666, 14634, 54418, 16438, 15251, 14083, 19116, 17130, 16001, 14682, 74244, 29816, 56469, 11418, 78514, 227541, 12366, 67490, 12367, 15259, 78757, 14725, 17535, 228094, 211468, 12402	834	653	29775	2.24159	0.0143553	0.00128556	0.00126532
Hyper	160	GOTERM_BP_DIRECT	GO:0006974~DNA damage response	27	2.61375	3.86e-06	93757, 22034, 107373, 72391, 74370, 56458, 268281, 77976, 12454, 14897, 50754, 245000, 217716, 12753, 54418, 11545, 21973, 108655, 245007, 241627, 56469, 12366, 67490, 12367, 56406, 17535, 12402	834	338	29775	2.85189	0.0146204	0.00128556	0.00126532
Hyper	160	GOTERM_BP_DIRECT	GO:0098696~regulation of neurotransmitter receptor localization to postsynaptic specialization membrane	8	0.774443	4.05e-06	50791, 69091, 22034, 665113, 26422, 545156, 56637, 23888	834	25	29775	11.4245	0.0153083	0.00128556	0.00126532
Hyper	160	GOTERM_BP_DIRECT	GO:0050804~modulation of chemical synaptic transmission	17	1.64569	4.68e-06	14360, 19699, 20320, 17295, 19055, 19266, 244310, 224997, 217480, 108071, 14803, 14408, 26570, 26420, 224671, 50873, 432530	834	149	29775	4.07332	0.0176898	0.00137293	0.00135132
Hyper	160	GOTERM_BP_DIRECT	GO:0045893~positive regulation of DNA-templated transcription	45	4.35624	1.14e-05	66277, 219249, 20750, 17126, 15364, 17187, 19883, 12394, 170826, 108660, 223701, 93691, 382066, 56458, 116871, 328572, 16974, 13548, 12753, 11865, 14634, 30942, 21413, 15251, 108655, 244579, 18028, 16543, 239985, 16001, 13593, 16364, 26401, 23871, 22762, 56469, 272322, 54169, 26420, 18507, 14048, 19713, 11477, 56406, 12326	834	783	29775	2.05181	0.0426064	0.00311003	0.00306107
Hyper	160	GOTERM_BP_DIRECT	GO:0006468~protein phosphorylation	26	2.51694	1.29e-05	17126, 19084, 665113, 225028, 26414, 59126, 77976, 245000, 232533, 13548, 56637, 13666, 11820, 14360, 26409, 16001, 18761, 108670, 226751, 26420, 15259, 231474, 381126, 17776, 12326, 12402	834	340	29775	2.73011	0.0478037	0.00326559	0.00321417
Hyper	160	GOTERM_BP_DIRECT	GO:0000381~regulation of alternative mRNA splicing, via spliceosome	11	1.06486	1.42e-05	68955, 76479, 67039, 105559, 13992, 52897, 170771, 13548, 268859, 67959, 14007	834	66	29775	5.95024	0.0528307	0.00330246	0.00325047
Hyper	160	GOTERM_BP_DIRECT	GO:0007626~locomotory behavior	15	1.45208	1.47e-05	17268, 320790, 19699, 110784, 74018, 66797, 15572, 108071, 78286, 13508, 50873, 268860, 320840, 11941, 11820	834	128	29775	4.18376	0.0545954	0.00330246	0.00325047
Hyper	160	GOTERM_BP_DIRECT	GO:0007010~cytoskeleton organization	16	1.54889	1.57e-05	328329, 20741, 665113, 225115, 26875, 13518, 226751, 27059, 245880, 320878, 78514, 78757, 17776, 70549, 56637, 56419	834	146	29775	3.91249	0.0582426	0.00333373	0.00328124
Hyper	160	GOTERM_BP_DIRECT	GO:0042752~regulation of circadian rhythm	11	1.06486	1.87e-05	21973, 27385, 19883, 26420, 19046, 50754, 74244, 26414, 432530, 56637, 12753	834	68	29775	5.77523	0.0686592	0.00374365	0.00368471
Hyper	160	GOTERM_BP_DIRECT	GO:0007417~central nervous system development	14	1.35528	2.07e-05	666173, 108138, 17984, 320790, 19699, 12394, 13131, 24136, 21417, 13508, 78896, 76626, 14634, 11820	834	115	29775	4.34626	0.0759369	0.0039487	0.00388654
Hyper	160	GOTERM_BP_DIRECT	GO:0010976~positive regulation of neuron projection development	18	1.7425	2.53e-05	18212, 14360, 244667, 19699, 20320, 17295, 56401, 12801, 76089, 50791, 328572, 26563, 227541, 216739, 16974, 19713, 320840, 16438	834	189	29775	3.40014	0.0920674	0.00459923	0.00452682
Hyper	160	GOTERM_BP_DIRECT	GO:0045444~fat cell differentiation	13	1.25847	3.16e-05	17130, 15364, 66797, 22762, 81703, 56469, 328572, 57753, 16974, 14773, 320840, 56637, 13666	834	103	29775	4.50601	0.113436	0.00538586	0.00530107
Hyper	160	GOTERM_BP_DIRECT	GO:0006357~regulation of transcription by RNA polymerase II	75	7.26041	3.25e-05	110784, 71640, 12394, 218030, 24136, 223701, 11746, 56458, 328572, 70827, 240690, 12753, 11865, 11820, 30942, 19038, 70127, 15273, 23857, 244579, 66660, 100072, 18028, 17130, 67239, 16364, 22762, 241944, 170753, 56469, 114142, 54169, 328365, 18507, 108829, 18986, 13853, 242523, 66277, 17268, 214498, 17187, 19883, 71069, 19046, 330301, 83925, 81703, 14390, 72391, 93691, 384763, 12454, 15403, 12013…	834	1632	29775	1.64069	0.116511	0.00538586	0.00530107
Hyper	160	GOTERM_BP_DIRECT	GO:0035176~social behavior	11	1.06486	3.52e-05	74370, 666173, 13508, 56710, 14803, 66797, 16535, 545156, 320840, 18191, 77087	834	73	29775	5.37967	0.125456	0.00558544	0.0054975
Hyper	160	GOTERM_BP_DIRECT	GO:0007612~learning	11	1.06486	5.01e-05	66673, 18212, 19699, 104015, 15572, 66797, 50873, 22333, 108071, 18191, 11820	834	76	29775	5.16731	0.173868	0.00763985	0.00751957
Hyper	160	GOTERM_BP_DIRECT	GO:0007411~axon guidance	18	1.7425	5.53e-05	18212, 75847, 65254, 19699, 20320, 16574, 117606, 20348, 20358, 93691, 11735, 13508, 210801, 26563, 545156, 214968, 13800, 14634	834	201	29775	3.19714	0.189914	0.00810036	0.00797283
Hyper	160	GOTERM_BP_DIRECT	GO:0030036~actin cytoskeleton organization	20	1.93611	6.04e-05	20741, 69538, 18175, 665113, 319974, 223701, 11426, 226751, 30785, 245880, 18858, 78757, 269587, 13800, 70549, 17886, 232227, 56419, 215789, 54418	834	243	29775	2.93839	0.205687	0.00852856	0.00839429
Hyper	160	GOTERM_BP_DIRECT	GO:0010629~negative regulation of gene expression	27	2.61375	7.08e-05	17246, 64451, 17126, 17187, 19084, 56490, 230674, 18858, 50873, 320910, 50754, 56637, 13666, 11820, 14360, 21413, 26409, 15251, 108655, 17295, 19055, 114774, 20404, 12929, 18986, 13853, 11479	834	400	29775	2.40985	0.236441	0.00963412	0.00948245
Hyper	160	GOTERM_BP_DIRECT	GO:0098609~cell-cell adhesion	18	1.7425	7.5e-05	93742, 23859, 16411, 241035, 19289, 227937, 117606, 23964, 54167, 13511, 320910, 16974, 16401, 70549, 17886, 320840, 210126, 14107	834	206	29775	3.11954	0.248704	0.00966208	0.00950996
Hyper	160	GOTERM_BP_DIRECT	GO:0007155~cell adhesion	31	3.00097	7.61e-05	20750, 16411, 240185, 66797, 636808, 18191, 116731, 77976, 18858, 235106, 70549, 17886, 211712, 16638, 210126, 11820, 93742, 17356, 19699, 13131, 117606, 99167, 13518, 382111, 23792, 26365, 13356, 13511, 16401, 12822, 13612	834	496	29775	2.23134	0.251642	0.00966208	0.00950996
Hyper	160	GOTERM_BP_DIRECT	GO:0003151~outflow tract morphogenesis	10	0.968054	7.91e-05	20148, 15251, 12929, 16974, 14048, 22762, 14725, 20348, 14613, 77087	834	65	29775	5.49253	0.260249	0.00972352	0.00957043
Hyper	160	GOTERM_BP_DIRECT	GO:0031175~neuron projection development	17	1.64569	9.55e-05	14360, 14585, 16001, 66797, 74244, 19274, 94040, 83814, 20404, 19281, 223701, 76089, 26420, 320840, 56637, 320365, 11820	834	190	29775	3.19434	0.305124	0.0111593	0.0109836
Hyper	160	GOTERM_BP_DIRECT	GO:0071560~cellular response to transforming growth factor beta stimulus	11	1.06486	9.66e-05	14360, 26409, 14083, 12929, 74117, 12827, 16001, 12394, 21417, 80707, 14118	834	82	29775	4.78922	0.308074	0.0111593	0.0109836
Hyper	160	GOTERM_BP_DIRECT	GO:0007179~transforming growth factor beta receptor signaling pathway	12	1.16167	0.000113	26409, 14083, 17126, 17130, 72993, 20340, 26401, 328365, 320910, 11477, 11545, 58250	834	100	29775	4.28417	0.350734	0.0127026	0.0125026
Hyper	160	GOTERM_BP_DIRECT	GO:0099149~regulation of postsynaptic neurotransmitter receptor internalization	8	0.774443	0.000128	234729, 17246, 104015, 208650, 269994, 64009, 83814, 232227	834	41	29775	6.96613	0.386671	0.0139663	0.0137465
Hyper	160	GOTERM_BP_DIRECT	GO:0007156~homophilic cell adhesion via plasma membrane adhesion molecules	16	1.54889	0.000146	18212, 20320, 19274, 19281, 13508, 116731, 26563, 26365, 320865, 13511, 12565, 19713, 12557, 211712, 64085, 14107	834	177	29775	3.22725	0.426037	0.0154208	0.0151781
Hyper	160	GOTERM_BP_DIRECT	GO:0050808~synapse organization	11	1.06486	0.000159	11735, 20320, 243499, 19266, 26422, 26875, 20965, 108071, 18191, 11941, 11820	834	87	29775	4.51398	0.45539	0.0164226	0.016164
Hyper	160	GOTERM_BP_DIRECT	GO:1904646~cellular response to amyloid-beta	8	0.774443	0.000175	14360, 12293, 16001, 16401, 108071, 56637, 11545, 11820	834	43	29775	6.64213	0.487035	0.0175655	0.017289
Hyper	160	GOTERM_BP_DIRECT	GO:0001701~in utero embryonic development	24	2.32333	0.000183	108138, 68795, 17126, 320790, 94217, 12394, 66797, 26433, 22034, 22762, 65969, 14390, 77097, 245944, 58250, 77087, 12454, 328365, 103149, 17886, 11477, 14634, 56419, 11479	834	354	29775	2.42044	0.501507	0.0178488	0.0175678
Hyper	160	GOTERM_BP_DIRECT	GO:0010628~positive regulation of gene expression	34	3.29138	0.000205	18212, 17246, 17126, 16411, 12374, 15364, 109676, 230674, 328572, 18858, 50873, 320910, 70208, 56637, 13666, 11820, 15251, 17356, 17295, 19055, 14066, 114774, 23871, 72162, 116838, 208449, 11735, 12944, 26420, 19713, 14527, 71648, 16449, 11479	834	601	29775	2.01972	0.542106	0.0195259	0.0192185
Hyper	160	GOTERM_BP_DIRECT	GO:0021987~cerebral cortex development	11	1.06486	0.00039	18212, 15251, 17356, 19699, 114142, 668158, 12929, 18507, 225523, 74244, 16974	834	97	29775	4.04862	0.774171	0.035149	0.0345956
Hyper	160	GOTERM_BP_DIRECT	GO:0030900~forebrain development	11	1.06486	0.00039	14360, 19699, 18028, 13175, 16974, 21417, 211712, 14725, 14634, 223701, 11820	834	97	29775	4.04862	0.774171	0.035149	0.0345956
Hyper	160	GOTERM_BP_DIRECT	GO:0022008~neurogenesis	13	1.25847	0.000397	108138, 18028, 218772, 215690, 225523, 260315, 20745, 78286, 77087, 56710, 70827, 215798, 18548	834	134	29775	3.46357	0.779467	0.035149	0.0345956
Hyper	160	GOTERM_BP_DIRECT	GO:0035264~multicellular organism growth	15	1.45208	0.000408	238871, 666173, 217843, 110532, 15364, 218772, 68259, 66797, 231051, 226525, 77087, 328572, 18858, 381126, 232685	834	174	29775	3.07771	0.788709	0.0353227	0.0347666
Hyper	160	GOTERM_BP_DIRECT	GO:0032436~positive regulation of proteasomal ubiquitin-dependent protein catabolic process	10	0.968054	0.000434	237353, 56469, 17246, 26374, 26420, 50873, 231474, 74244, 67296, 56637	834	81	29775	4.40759	0.808822	0.0367104	0.0361325
Hyper	160	GOTERM_BP_DIRECT	GO:0001755~neural crest cell migration	8	0.774443	0.000458	15251, 24136, 214968, 19713, 11477, 20348, 20358, 77087	834	50	29775	5.71223	0.825722	0.0367104	0.0361325
Hyper	160	GOTERM_BP_DIRECT	GO:0030010~establishment of cell polarity	8	0.774443	0.000458	93742, 668158, 12929, 16001, 338362, 56637, 20336, 56419	834	50	29775	5.71223	0.825722	0.0367104	0.0361325
Hyper	160	GOTERM_BP_DIRECT	GO:0007097~nuclear migration	6	0.580833	0.000462	16906, 226751, 14083, 64009, 94040, 319565	834	24	29775	8.92536	0.828386	0.0367104	0.0361325
Hyper	160	GOTERM_BP_DIRECT	GO:0006869~lipid transport	11	1.06486	0.000499	74309, 666173, 70676, 21763, 230895, 68453, 320528, 20494, 26357, 22333, 64291	834	100	29775	3.92716	0.8505	0.0387752	0.0381648
Hyper	160	GOTERM_BP_DIRECT	GO:0001568~blood vessel development	10	0.968054	0.00052	15251, 14083, 76089, 56458, 17246, 320790, 69538, 12929, 26365, 14613	834	83	29775	4.30138	0.862489	0.0396707	0.0390462
Hyper	160	GOTERM_BP_DIRECT	GO:0032092~positive regulation of protein binding	9	0.871249	0.000551	76089, 328572, 54126, 67490, 50873, 269587, 29816, 56637, 13666	834	67	29775	4.79572	0.877637	0.0411801	0.0405318
Hypo	160	GOTERM_BP_DIRECT	GO:0007399~nervous system development	42	4.02299	5.99e-18	18213, 70892, 19266, 21828, 19063, 665113, 110789, 74053, 20238, 18191, 76089, 15529, 11682, 76965, 16974, 214968, 71738, 56758, 50758, 320772, 70127, 666173, 243743, 215378, 17258, 23859, 18189, 14462, 66945, 108151, 18183, 79221, 20666, 14805, 22240, 16800, 211323, 545156, 12767, 14348, 17933, 14107	759	311	29775	5.29784	1.81e-14	1.81e-14	1.76e-14
Hypo	160	GOTERM_BP_DIRECT	GO:0007156~homophilic cell adhesion via plasma membrane adhesion molecules	32	3.06513	2.01e-17	18212, 93713, 93712, 93711, 93699, 93710, 19281, 330222, 23965, 13507, 12554, 54216, 211712, 93709, 12558, 19876, 215654, 93701, 219257, 93700, 19274, 270120, 103611158, 545370, 102640594, 320865, 239857, 93715, 12563, 93714, 18526, 14107	759	177	29775	7.09229	6.07e-14	3.03e-14	2.96e-14
Hypo	160	GOTERM_BP_DIRECT	GO:0050804~modulation of chemical synaptic transmission	21	2.01149	1.48e-09	14360, 19699, 243961, 242443, 19055, 18231, 108069, 19266, 18183, 217480, 19262, 241568, 22215, 243725, 14805, 14806, 14803, 14804, 12287, 12558, 14799	759	149	29775	5.52895	4.47e-06	1.49e-06	1.45e-06
Hypo	160	GOTERM_BP_DIRECT	GO:0010976~positive regulation of neuron projection development	23	2.20307	3.49e-09	18212, 14360, 18213, 19699, 13176, 20187, 19762, 14362, 18189, 77480, 243725, 23965, 13837, 76089, 50791, 22240, 242274, 16403, 211323, 14025, 16974, 19317, 14348	759	189	29775	4.77393	1.05e-05	2.63e-06	2.57e-06
Hypo	160	GOTERM_BP_DIRECT	GO:0007155~cell adhesion	38	3.63985	7.24e-09	18795, 93713, 16773, 93712, 93711, 93699, 93710, 216033, 66797, 241639, 19262, 18191, 235106, 54216, 226041, 211712, 93709, 12558, 11820, 17475, 18488, 19699, 93701, 219257, 93700, 19272, 103611158, 54420, 102640594, 23792, 16403, 239857, 93715, 12386, 93714, 100689, 18526, 13612	759	496	29775	3.00547	2.18e-05	4.37e-06	4.26e-06
Hypo	160	GOTERM_BP_DIRECT	GO:0099560~synaptic membrane adhesion	11	1.05364	2.02e-08	13837, 23966, 19266, 18189, 76965, 211323, 13640, 12563, 241568, 16180, 23965	759	37	29775	11.6627	6.08e-05	1.01e-05	9.9e-06
Hypo	160	GOTERM_BP_DIRECT	GO:0007411~axon guidance	22	2.10728	5.33e-08	18212, 19876, 75847, 20564, 243743, 545428, 65254, 20563, 19699, 13176, 16773, 18187, 20187, 19277, 14462, 108151, 17260, 20315, 13837, 13640, 545156, 214968	759	201	29775	4.29375	0.000161	2.29e-05	2.24e-05
Hypo	160	GOTERM_BP_DIRECT	GO:0051965~positive regulation of synapse assembly	14	1.341	1.51e-07	18212, 18213, 21983, 20563, 19266, 18189, 99633, 239250, 16180, 11418, 14804, 76965, 13640, 16979	759	82	29775	6.69768	0.000455	5.04e-05	4.92e-05
Hypo	160	GOTERM_BP_DIRECT	GO:0007420~brain development	23	2.20307	1.57e-07	18795, 15373, 666173, 17268, 545428, 72899, 19699, 383619, 244653, 68519, 19063, 24113, 20679, 20238, 20315, 12190, 20666, 56710, 11682, 211323, 67890, 12767, 18516	759	233	29775	3.87242	0.000472	5.04e-05	4.92e-05
Hypo	160	GOTERM_BP_DIRECT	GO:1905606~regulation of presynapse assembly	10	0.957854	1.67e-07	18213, 14804, 14362, 18189, 76965, 211323, 239250, 320772, 16180, 11820	759	35	29775	11.2084	0.000504	5.04e-05	4.92e-05
Hypo	160	GOTERM_BP_DIRECT	GO:0048666~neuron development	13	1.24521	3.52e-07	23966, 20563, 100042165, 20616, 17260, 270120, 23964, 23965, 22240, 170788, 17933, 18516, 14107	759	74	29775	6.89162	0.00105997	9.64e-05	9.41e-05
Hypo	160	GOTERM_BP_DIRECT	GO:0060078~regulation of postsynaptic membrane potential	10	0.957854	9e-07	14803, 14407, 16508, 242443, 14395, 13483, 15165, 14399, 14406, 14799	759	42	29775	9.3403	0.00271071	0.000226	0.000221
Hypo	160	GOTERM_BP_DIRECT	GO:0019228~neuronal action potential	11	1.05364	1.12e-06	14806, 58802, 110862, 16508, 16531, 13483, 66797, 15165, 13488, 20271, 14799	759	55	29775	7.84585	0.0033716	0.00026	0.000254
Hypo	160	GOTERM_BP_DIRECT	GO:0007416~synapse assembly	12	1.14943	1.29e-06	11418, 243743, 18189, 76965, 18183, 211323, 12558, 239250, 330222, 14799, 18191, 103967	759	69	29775	6.82248	0.00388034	0.000278	0.000271
Hypo	160	GOTERM_BP_DIRECT	GO:0098609~cell-cell adhesion	20	1.91571	1.54e-06	19876, 20563, 23859, 13176, 216033, 270120, 18163, 110789, 330222, 20315, 23964, 13507, 11899, 76740, 242274, 16403, 12386, 16974, 12558, 14107	759	206	29775	3.80866	0.00464678	0.000311	0.000303
Hypo	160	GOTERM_BP_DIRECT	GO:0001764~neuron migration	17	1.62835	1.83e-06	18212, 14360, 18213, 19699, 13176, 18187, 14462, 17260, 19091, 20315, 319974, 11899, 76089, 13488, 211323, 12767, 320772	759	152	29775	4.38748	0.0055075	0.000345	0.000337
Hypo	160	GOTERM_BP_DIRECT	GO:0051649~establishment of localization in cell	20	1.91571	2.54e-06	243634, 22318, 110862, 18754, 13483, 65969, 83814, 110789, 116838, 14805, 80795, 11418, 102607, 22283, 380654, 12287, 76757, 110082, 27062, 11303	759	213	29775	3.6835	0.00763575	0.000451	0.00044
Hypo	160	GOTERM_BP_DIRECT	GO:0051897~positive regulation of phosphatidylinositol 3-kinase/protein kinase B signal transduction	20	1.91571	4.09e-06	18212, 14360, 18213, 21983, 19699, 71785, 16367, 20187, 72446, 18596, 18189, 14462, 22215, 20315, 14309, 57257, 78757, 211323, 12311, 11600	759	220	29775	3.5663	0.0122601	0.000685	0.000669
Hypo	160	GOTERM_BP_DIRECT	GO:0030154~cell differentiation	38	3.63985	7.77e-06	18213, 14051, 70892, 213262, 71981, 73862, 17260, 14390, 242748, 23965, 211739, 76089, 15529, 238217, 54216, 214968, 18755, 171211, 19726, 11600, 15373, 14360, 19876, 17258, 20482, 108151, 22762, 56363, 73472, 83814, 116838, 116837, 56503, 12167, 16800, 211323, 12386, 76858	759	660	29775	2.25865	0.0231652	0.00123356	0.00120452
Hypo	160	GOTERM_BP_DIRECT	GO:0035176~social behavior	11	1.05364	1.58e-05	666173, 56710, 14803, 215378, 243961, 66797, 18189, 13488, 545156, 20238, 18191	759	73	29775	5.91126	0.0464122	0.00221634	0.00216417
Hypo	160	GOTERM_BP_DIRECT	GO:0030534~adult behavior	9	0.862069	1.59e-05	14805, 243961, 66797, 18189, 11682, 76965, 14406, 18191, 108073	759	45	29775	7.84585	0.0469096	0.00221634	0.00216417
Hypo	160	GOTERM_BP_DIRECT	GO:0007269~neurotransmitter secretion	8	0.766284	1.62e-05	19276, 18189, 19063, 12287, 20616, 116838, 18191, 116837	759	33	29775	9.51012	0.0475902	0.00221634	0.00216417
Hypo	160	GOTERM_BP_DIRECT	GO:0000902~cell morphogenesis	15	1.43678	1.99e-05	215654, 18027, 19699, 98558, 66797, 19277, 14462, 20679, 16800, 320865, 12554, 211323, 12563, 12558, 11774	759	144	29775	4.08638	0.0581917	0.00260665	0.00254529
Hypo	160	GOTERM_BP_DIRECT	GO:0016477~cell migration	23	2.20307	2.23e-05	215654, 19699, 239337, 16367, 216033, 19272, 70385, 23888, 13837, 64817, 11899, 15529, 57257, 320865, 13488, 12554, 18826, 12386, 12563, 12558, 12767, 103978, 14107	759	315	29775	2.86436	0.0649955	0.00272703	0.00266283
Hypo	160	GOTERM_BP_DIRECT	GO:0007612~learning	11	1.05364	2.26e-05	66673, 18212, 18795, 19699, 66797, 18189, 13488, 18163, 20238, 18191, 11820	759	76	29775	5.67792	0.0659045	0.00272703	0.00266283
Hypo	160	GOTERM_BP_DIRECT	GO:0048699~generation of neurons	7	0.670498	5e-05	12704, 18027, 170788, 100042165, 16974, 12767, 14107	759	27	29775	10.1705	0.140013	0.00580131	0.00566474
Hypo	160	GOTERM_BP_DIRECT	GO:0051932~synaptic transmission, GABAergic	7	0.670498	6.23e-05	14805, 14407, 21983, 18754, 14395, 14399, 14406	759	28	29775	9.80731	0.171269	0.00677105	0.00661166
Hypo	160	GOTERM_BP_DIRECT	GO:0007157~heterophilic cell-cell adhesion via plasma membrane cell adhesion molecules	9	0.862069	6.29e-05	545370, 23966, 14804, 170788, 19266, 18189, 12558, 23964, 23965	759	54	29775	6.53821	0.172706	0.00677105	0.00661166
Hypo	160	GOTERM_BP_DIRECT	GO:0035249~synaptic transmission, glutamatergic	9	0.862069	8.21e-05	14805, 14806, 14803, 14804, 74007, 242443, 108069, 13488, 14799	759	56	29775	6.3047	0.219275	0.00853523	0.0083343
Hypo	160	GOTERM_BP_DIRECT	GO:0007626~locomotory behavior	13	1.24521	0.000109	268515, 109205, 17268, 19699, 66797, 11899, 14309, 60344, 27386, 13488, 211323, 12287, 11820	759	128	29775	3.98422	0.280226	0.0106064	0.0103568
Hypo	160	GOTERM_BP_DIRECT	GO:0019722~calcium-mediated signaling	13	1.24521	0.000109	244579, 19055, 243725, 14805, 14806, 24052, 11607, 13488, 20192, 12767, 14799, 16439, 11820	759	128	29775	3.98422	0.280226	0.0106064	0.0103568
Hypo	160	GOTERM_BP_DIRECT	GO:0007165~signal transduction	45	4.31034	0.000117	244867, 18575, 23966, 18795, 435766, 71785, 19762, 19266, 18596, 21828, 21949, 80877, 99633, 67505, 19262, 19281, 20315, 23964, 23965, 224065, 29863, 50791, 381511, 14696, 171211, 320078, 241489, 223838, 15273, 18583, 18189, 14462, 19272, 19274, 19091, 170799, 50540, 232441, 211323, 232201, 14406, 16847, 320265, 216810, 12326	759	951	29775	1.85627	0.297403	0.0108808	0.0106246
Hypo	160	GOTERM_BP_DIRECT	GO:0071625~vocalization behavior	6	0.574713	0.000119	56710, 243961, 66797, 18189, 76965, 18191	759	20	29775	11.7688	0.301687	0.0108808	0.0106246
Hypo	160	GOTERM_BP_DIRECT	GO:0098815~modulation of excitatory postsynaptic potential	5	0.478927	0.000175	14805, 14806, 81907, 26875, 11820	759	12	29775	16.3455	0.410538	0.0151	0.0147445
Hypo	160	GOTERM_BP_DIRECT	GO:1990416~cellular response to brain-derived neurotrophic factor stimulus	5	0.478927	0.000175	18212, 81907, 74053, 22215, 14799	759	12	29775	16.3455	0.410538	0.0151	0.0147445
Hypo	160	GOTERM_BP_DIRECT	GO:0035235~ionotropic glutamate receptor signaling pathway	6	0.574713	0.000194	14805, 14806, 67579, 242443, 14799, 11820	759	22	29775	10.6989	0.442748	0.015101	0.0147455
Hypo	160	GOTERM_BP_DIRECT	GO:0035418~protein localization to synapse	6	0.574713	0.000194	11418, 19699, 23859, 243961, 18189, 26875	759	22	29775	10.6989	0.442748	0.015101	0.0147455
Hypo	160	GOTERM_BP_DIRECT	GO:0099170~postsynaptic modulation of chemical synaptic transmission	7	0.670498	0.000195	66673, 18795, 13176, 19055, 108069, 13488, 12326	759	34	29775	8.07661	0.445117	0.015101	0.0147455
Hypo	160	GOTERM_BP_DIRECT	GO:0007214~gamma-aminobutyric acid signaling pathway	7	0.670498	0.000195	12704, 14407, 227120, 15562, 14395, 14399, 14406	759	34	29775	8.07661	0.445117	0.015101	0.0147455
Hypo	160	GOTERM_BP_DIRECT	GO:0016082~synaptic vesicle priming	6	0.574713	0.000243	76740, 320405, 238988, 27062, 116838, 116837	759	23	29775	10.2337	0.51886	0.0182877	0.0178572
Hypo	160	GOTERM_BP_DIRECT	GO:0097106~postsynaptic density organization	4	0.383142	0.00031	66797, 18189, 81907, 18191	759	6	29775	26.1528	0.607841	0.0228279	0.0222905
Hypo	160	GOTERM_BP_DIRECT	GO:0060079~excitatory postsynaptic potential	9	0.862069	0.000327	14805, 14806, 14804, 108013, 19055, 66797, 17260, 243725, 20238	759	68	29775	5.19211	0.626865	0.0234679	0.0229155
Hypo	160	GOTERM_BP_DIRECT	GO:0098696~regulation of neurotransmitter receptor localization to postsynaptic specialization membrane	6	0.574713	0.000367	50791, 665113, 26422, 545156, 81907, 23888	759	25	29775	9.41502	0.669642	0.0251528	0.0245607
Hypo	160	GOTERM_BP_DIRECT	GO:0050808~synapse organization	10	0.957854	0.000374	327814, 243961, 19266, 18189, 26422, 99633, 18163, 26875, 18191, 11820	759	87	29775	4.50911	0.676572	0.0251528	0.0245607
Hypo	160	GOTERM_BP_DIRECT	GO:0035556~intracellular signal transduction	25	2.39464	0.000375	66772, 18795, 18754, 19762, 18596, 66797, 665113, 217480, 117589, 18755, 14360, 102371, 210044, 269019, 18183, 114875, 26405, 26921, 27278, 227120, 211323, 545156, 18805, 217944, 12326	759	435	29775	2.25455	0.677641	0.0251528	0.0245607
Hypo	160	GOTERM_BP_DIRECT	GO:0031175~neuron projection development	15	1.43678	0.000389	14360, 18488, 20187, 66797, 18189, 19272, 19274, 81907, 83814, 243725, 19281, 76089, 14309, 380842, 11820	759	190	29775	3.09705	0.690739	0.0255074	0.0249069
Hypo	160	GOTERM_BP_DIRECT	GO:2000463~positive regulation of excitatory postsynaptic potential	7	0.670498	0.000425	19699, 243961, 18189, 116838, 14799, 116837, 11820	759	39	29775	7.04115	0.722749	0.0272885	0.0266461
Hypo	160	GOTERM_BP_DIRECT	GO:0071277~cellular response to calcium ion	10	0.957854	0.000482	110862, 17258, 108079, 18189, 20271, 17260, 20192, 16500, 110789, 74020	759	90	29775	4.35881	0.766138	0.0302641	0.0295516
Hypo	160	GOTERM_BP_DIRECT	GO:0150037~regulation of calcium-dependent activation of synaptic vesicle fusion	4	0.383142	0.000533	238988, 12287, 116838, 116837	759	7	29775	22.4167	0.799571	0.0327932	0.0320212
Hypo	160	GOTERM_BP_DIRECT	GO:0050919~negative chemotaxis	7	0.670498	0.000561	20564, 20563, 20187, 18187, 108151, 13640, 214968	759	41	29775	6.69768	0.816123	0.0338603	0.0330631
Hypo	160	GOTERM_BP_DIRECT	GO:0048167~regulation of synaptic plasticity	9	0.862069	0.000583	76089, 110862, 238988, 17260, 18163, 116838, 22215, 14799, 116837	759	74	29775	4.77112	0.827816	0.0344839	0.0336721
Hypo	160	GOTERM_BP_DIRECT	GO:0050772~positive regulation of axonogenesis	7	0.670498	0.000641	18212, 19876, 243743, 20482, 76965, 20616, 24136	759	42	29775	6.53821	0.855392	0.0371752	0.0363001
Hypo	160	GOTERM_BP_DIRECT	GO:0007268~chemical synaptic transmission	13	1.24521	0.000718	23859, 16531, 15562, 66797, 18189, 20616, 18191, 108073, 14806, 12287, 16974, 14406, 14799	759	157	29775	3.24828	0.885469	0.0406849	0.0397272
Hypo	160	GOTERM_BP_DIRECT	GO:0099171~presynaptic modulation of chemical synaptic transmission	8	0.766284	0.000728	14805, 14806, 18754, 242443, 13488, 76161, 18191, 108073	759	59	29775	5.31922	0.888951	0.0406849	0.0397272
Hypo	160	GOTERM_BP_DIRECT	GO:0036120~cellular response to platelet-derived growth factor stimulus	6	0.574713	0.000755	14360, 18754, 71785, 19266, 18596, 100689	759	29	29775	8.1164	0.897351	0.0413743	0.0404003
Hypo	160	GOTERM_BP_DIRECT	GO:0042391~regulation of membrane potential	10	0.957854	0.000833	14805, 14806, 11418, 16531, 13483, 15165, 83814, 116838, 116837, 211468	759	97	29775	4.04425	0.919008	0.0448635	0.0438074

## Sheet: All_significant_RNAseq
Upregulated/Downregulated	Timepoint	Category	Term	Count	%	PValue	Genes	List Total	Pop Hits	Pop Total	Fold Enrichment	Bonferroni	Benjamini	FDR
Downregulated	80	GOTERM_BP_DIRECT	GO:0045087~innate immune response	19	12.6667	2.83e-11	NM_001037859, NM_021384, NM_178911, NM_001024230, NM_173434, NM_008987, NM_175449, NM_009735, NM_009841, NM_007572, NM_009777, NM_008331, NM_134250, NM_009987, NM_031178, NM_001045540, NM_025992, NM_023044, NM_019949	137	517	29775	7.98719	3.13e-08	3.13e-08	3.09e-08
Downregulated	80	GOTERM_BP_DIRECT	GO:0006954~inflammatory response	15	10	4.64e-09	NM_001037859, NM_001081211, NM_178911, NM_175449, NM_009779, NM_009912, NM_010169, NM_009841, NM_009778, NM_134250, NM_009987, NM_010101, NM_011693, NM_018866, NM_010902	137	399	29775	8.17052	5.12e-06	2.56e-06	2.53e-06
Downregulated	80	GOTERM_BP_DIRECT	GO:0007204~positive regulation of cytosolic calcium ion concentration	8	5.33333	1.78e-05	NM_010169, NM_010303, NM_172285, NM_009987, NM_018866, NM_007646, NM_009779, NM_009912	137	177	29775	9.82309	0.0195074	0.00469873	0.00464341
Downregulated	80	GOTERM_BP_DIRECT	GO:0006955~immune response	12	8	2.09e-05	XM_006510638, NM_001143689, NM_009987, NM_153175, NM_010398, NM_031178, NM_018866, NM_010391, NM_009515, NM_001351947, NM_009735, NM_009912	137	503	29775	5.18495	0.0228497	0.00469873	0.00464341
Downregulated	80	GOTERM_BP_DIRECT	GO:0032760~positive regulation of tumor necrosis factor production	7	4.66667	2.13e-05	NM_009841, NM_001037859, NM_134250, NM_172285, NM_001081211, NM_010398, NM_031178	137	122	29775	12.4701	0.0232201	0.00469873	0.00464341
Downregulated	80	GOTERM_BP_DIRECT	GO:0050731~positive regulation of peptidyl-tyrosine phosphorylation	6	4	0.000154	NM_172285, XM_006520383, NM_008225, NM_011219, NM_016900, NM_012009	137	110	29775	11.8547	0.156257	0.0283157	0.0279823
Downregulated	80	GOTERM_BP_DIRECT	GO:0098883~synapse pruning	3	2	0.000205	NM_007572, NM_009777, NM_009987	137	5	29775	130.401	0.20277	0.0323699	0.0319887
Downregulated	80	GOTERM_BP_DIRECT	GO:0022614~membrane to membrane docking	3	2	0.000307	NM_011693, NM_009510, NM_010833	137	6	29775	108.668	0.287458	0.0419108	0.0414173
Downregulated	80	GOTERM_BP_DIRECT	GO:0009617~response to bacterium	8	5.33333	0.000342	NM_008630, NM_133977, NM_009841, NM_008331, NM_009778, NM_133198, NM_053214, NM_025992	137	284	29775	6.12213	0.314263	0.0419108	0.0414173
Downregulated	80	GOTERM_BP_DIRECT	GO:0001774~microglial cell activation	4	2.66667	0.00042	NM_007572, NM_001037859, NM_009987, NM_031178	137	32	29775	27.167	0.370793	0.0463198	0.0457743
Upregulated	120	GOTERM_BP_DIRECT	GO:0006954~inflammatory response	11	16.4179	1.13e-08	NM_009841, NM_010169, NM_001037859, NM_134250, NM_009778, NM_009987, NM_001081211, NM_178911, NM_010101, NM_018866, NM_009779	64	399	29775	12.826	8.68e-06	8.68e-06	8.5e-06
Upregulated	120	GOTERM_BP_DIRECT	GO:0045087~innate immune response	10	14.9254	1.38e-06	NM_009841, NM_008331, NM_001037859, NM_134250, NM_009987, NM_178911, NM_021384, NM_173434, NM_008987, NM_009735	64	517	29775	8.99873	0.00105514	0.000528	0.000517
Upregulated	120	GOTERM_BP_DIRECT	GO:0007204~positive regulation of cytosolic calcium ion concentration	6	8.95522	3.73e-05	NM_010169, NM_010303, NM_009987, NM_018866, NM_007646, NM_009779	64	177	29775	15.7707	0.0281681	0.00952396	0.00932503
Upregulated	120	GOTERM_BP_DIRECT	GO:0032760~positive regulation of tumor necrosis factor production	5	7.46269	0.000133	NM_009841, NM_001037859, NM_134250, NM_001081211, NM_010398	64	122	29775	19.067	0.0965657	0.0253863	0.024856
Upregulated	120	GOTERM_BP_DIRECT	GO:0007200~phospholipase C-activating G protein-coupled receptor signaling pathway	5	7.46269	0.00018	NM_010169, NM_009987, NM_001081211, NM_019549, NM_009779	64	132	29775	17.6225	0.128478	0.0275003	0.0269259
Upregulated	120	GOTERM_BP_DIRECT	GO:0009617~response to bacterium	6	8.95522	0.000341	NM_008630, NM_133977, NM_009841, NM_008331, NM_009778, NM_011909	64	284	29775	9.8289	0.229861	0.0366412	0.0358759
Upregulated	120	GOTERM_BP_DIRECT	GO:0001916~positive regulation of T cell mediated cytotoxicity	4	5.97015	0.000359	NM_001143689, NM_010398, NM_010391, NM_009735	64	65	29775	28.6298	0.24051	0.0366412	0.0358759
Upregulated	120	GOTERM_BP_DIRECT	GO:0045766~positive regulation of angiogenesis	5	7.46269	0.000383	NM_009778, NM_009987, NM_013820, XM_006535399, NM_009779	64	161	29775	14.4483	0.254116	0.0366412	0.0358759
Upregulated	120	GOTERM_BP_DIRECT	GO:0071222~cellular response to lipopolysaccharide	6	8.95522	0.00057	NM_009841, NM_134250, NM_009987, NM_018866, NM_009735, NM_011701	64	318	29775	8.77801	0.353941	0.0485266	0.047513
Downregulated	120	GOTERM_BP_DIRECT	GO:0051412~response to corticosterone	3	14.2857	0.000134	NM_010234, NM_009426, NM_010910	20	27	29775	165.417	0.0404717	0.0413107	0.0413107
Upregulated	160	GOTERM_BP_DIRECT	GO:0032760~positive regulation of tumor necrosis factor production	14	4.30769	3.8e-10	NM_001077495, XM_006529238, NM_001037859, NM_172285, NM_001081211, NM_010511, NM_009841, NM_031185, NM_134250, NM_010398, NM_010175, NM_031178, NM_011609, NM_019979	303	122	29775	11.2766	8.91e-07	8.91e-07	8.72e-07
Upregulated	160	GOTERM_BP_DIRECT	GO:0045087~innate immune response	24	7.38462	4.08e-09	NM_023456, NM_020267, NM_019440, NM_001113356, NM_001037859, NM_021384, NM_178911, NM_001024230, NM_173434, NM_008889, NM_008987, NM_175449, NM_009735, NM_025817, NM_009841, NM_007572, NM_009777, NM_008331, NM_134250, NM_010730, NM_009987, NM_010175, NM_031178, NM_018738	303	517	29775	4.56173	9.56e-06	4.78e-06	4.68e-06
Upregulated	160	GOTERM_BP_DIRECT	GO:0006954~inflammatory response	20	6.15385	3.25e-08	NM_001037859, NM_001081211, NM_178911, NM_175449, NM_009779, NM_009912, NM_025817, NM_010169, NM_009841, NM_009778, NM_134250, NM_010730, NM_009987, NM_010101, NM_011693, NM_016753, NM_018866, NM_011609, NM_010902, NM_009142	303	399	29775	4.92568	7.62e-05	2.54e-05	2.49e-05
Upregulated	160	GOTERM_BP_DIRECT	GO:0070374~positive regulation of ERK1 and ERK2 cascade	14	4.30769	6.77e-07	NM_023456, NM_024457, NM_001037859, NM_022410, NM_010591, NM_008714, NM_009912, NM_053110, NM_010169, NM_031185, NM_009778, NM_134250, NM_008138, NM_028444	303	228	29775	6.03396	0.00158577	0.000353	0.000345
Upregulated	160	GOTERM_BP_DIRECT	GO:0001774~microglial cell activation	7	2.15385	7.52e-07	NM_010511, NM_007572, NM_001037859, NM_009987, NM_031178, NM_010591, NM_009142	303	32	29775	21.496	0.00176183	0.000353	0.000345
Upregulated	160	GOTERM_BP_DIRECT	GO:0042060~wound healing	8	2.46154	1.35e-05	XM_036163594, NM_023842, NM_008909, NM_007472, NM_080555, NM_011945, NM_144848, NM_009142	303	77	29775	10.2096	0.0311626	0.00527637	0.00516612
Upregulated	160	GOTERM_BP_DIRECT	GO:0030335~positive regulation of cell migration	13	4	2.37e-05	NM_001077495, NM_177782, NM_001037859, NM_008714, NM_009779, NM_009912, NM_008608, NM_053110, NM_010169, NM_008143, NM_008138, NM_011219, NM_009142	303	271	29775	4.71393	0.0539952	0.00673798	0.00659719
Upregulated	160	GOTERM_BP_DIRECT	GO:0071222~cellular response to lipopolysaccharide	14	4.30769	2.52e-05	XM_006529238, NM_019440, NM_008625, NM_009735, NM_009775, NM_009841, NM_134250, NM_009987, NM_031178, NM_018866, NM_018738, NM_011756, NM_011701, NM_011404	303	318	29775	4.32623	0.0572788	0.00673798	0.00659719
Upregulated	160	GOTERM_BP_DIRECT	GO:0048661~positive regulation of smooth muscle cell proliferation	8	2.46154	2.59e-05	NM_001077495, NM_001081211, NM_010496, NM_010442, NM_010591, NM_009779, NM_009658, NM_009142	303	85	29775	9.24869	0.0588405	0.00673798	0.00659719
Upregulated	160	GOTERM_BP_DIRECT	GO:0071320~cellular response to cAMP	7	2.15385	3.95e-05	NM_007475, NM_024457, NM_007472, NM_001081211, NM_008226, NM_007564, NM_009510	303	62	29775	11.0947	0.0885216	0.00917242	0.00898075
Upregulated	160	GOTERM_BP_DIRECT	GO:0071356~cellular response to tumor necrosis factor	9	2.76923	4.3e-05	NM_031185, NM_001001806, NM_009987, NM_011693, NM_007564, NM_010907, NM_010902, NM_009142, NM_011756	303	125	29775	7.07525	0.0959754	0.00917242	0.00898075
Upregulated	160	GOTERM_BP_DIRECT	GO:0043524~negative regulation of neuron apoptotic process	11	3.38462	5.26e-05	NM_010169, NM_028803, NM_023871, NM_010442, NM_010591, NM_011175, NM_011716, NM_008129, NM_016701, NM_011219, NM_027154	303	206	29775	5.24728	0.116021	0.0102766	0.0100618
Upregulated	160	GOTERM_BP_DIRECT	GO:0043065~positive regulation of apoptotic process	15	4.61538	6.52e-05	NM_019564, NM_010591, NM_008714, NM_009775, NM_010169, NM_008143, NM_008495, NM_010730, NM_010175, NM_009344, NM_009983, NM_009115, NM_013750, NM_011945, NM_019739	303	399	29775	3.69426	0.141729	0.0117562	0.0115105
Upregulated	160	GOTERM_BP_DIRECT	GO:0043410~positive regulation of MAPK cascade	11	3.38462	9.09e-05	NM_013867, NM_010169, NM_172285, NM_010686, NM_011594, NM_031178, NM_011945, NM_016900, NM_133655, NM_009142, NM_134438	303	220	29775	4.91337	0.191958	0.0152237	0.0149056
Upregulated	160	GOTERM_BP_DIRECT	GO:0002237~response to molecule of bacterial origin	4	1.23077	0.000118	NM_009841, NM_011530, NM_031178, NM_009735	303	10	29775	39.3069	0.241029	0.0179335	0.0175587
Upregulated	160	GOTERM_BP_DIRECT	GO:0008360~regulation of cell shape	9	2.76923	0.000122	NM_010302, NM_027219, NM_001037859, NM_010730, NM_022410, NM_009115, NM_009510, NM_011715, NM_010833	303	145	29775	6.09935	0.249453	0.0179335	0.0175587
Upregulated	160	GOTERM_BP_DIRECT	GO:0042127~regulation of cell population proliferation	10	3.07692	0.000138	NM_008245, NM_010730, NM_153143, NM_016740, NM_010907, NM_010591, NM_008714, NM_133655, NM_011448, NM_019739	303	188	29775	5.22699	0.276204	0.0190131	0.0186158
Upregulated	160	GOTERM_BP_DIRECT	GO:0035556~intracellular signal transduction	15	4.61538	0.000161	NM_177782, NM_025800, NM_172285, NM_178749, NM_177725, NM_007707, NM_010302, NM_009732, NM_010696, NM_008143, NM_010442, NM_001042660, NM_019549, NM_177093, NM_011756	303	435	29775	3.38853	0.315278	0.0210395	0.0205999
Upregulated	160	GOTERM_BP_DIRECT	GO:0071364~cellular response to epidermal growth factor stimulus	6	1.84615	0.000183	XM_006529238, NM_001001806, NM_007564, NM_010106, NM_011756, NM_011448	303	52	29775	11.3385	0.348481	0.0225479	0.0220767
Upregulated	160	GOTERM_BP_DIRECT	GO:0008284~positive regulation of cell population proliferation	18	5.53846	0.00021	NM_023456, NM_001037859, NM_010591, NM_011175, NM_008714, NM_007646, NM_010169, NM_013867, NM_031166, NM_009732, NM_007451, NM_009976, NM_010496, NM_008138, NM_009115, NM_007393, NM_009142, NM_011448	303	616	29775	2.87145	0.388588	0.0245966	0.0240827
Upregulated	160	GOTERM_BP_DIRECT	GO:0045732~positive regulation of protein catabolic process	7	2.15385	0.000231	NM_011436, NM_009503, NM_009510, NM_145925, NM_011448, NM_010833, NM_019739	303	85	29775	8.0926	0.418871	0.0258438	0.0253038
Upregulated	160	GOTERM_BP_DIRECT	GO:1903076~regulation of protein localization to plasma membrane	5	1.53846	0.000263	NM_001077495, NM_008143, NM_016794, NM_007393, NM_008608	303	31	29775	15.8496	0.460361	0.0280352	0.0274494
Upregulated	160	GOTERM_BP_DIRECT	GO:0006879~intracellular iron ion homeostasis	6	1.84615	0.000419	NM_133977, NM_010442, NM_010240, NM_009735, NM_028593, NM_024173	303	62	29775	9.50974	0.625583	0.0427034	0.0418111
Downregulated	160	GOTERM_BP_DIRECT	GO:0048167~regulation of synaptic plasticity	7	2.52708	5.2e-06	XR_001778822, XM_030250872, XM_030252869, NM_177049, XM_017314246, XM_011244952, NM_008170, XM_006518549	177	74	29775	15.9127	0.00571912	0.00573552	0.00568872
Downregulated	160	GOTERM_BP_DIRECT	GO:0099170~postsynaptic modulation of chemical synaptic transmission	5	1.80505	4.76e-05	NM_022029, XM_006520052, NM_001109975, XM_006498930, NM_010910	177	34	29775	24.7383	0.0511841	0.0262696	0.0260553
Downregulated	160	GOTERM_BP_DIRECT	GO:0008277~regulation of G protein-coupled receptor signaling pathway	5	1.80505	0.000133	NM_001004761, XM_006537819, NM_001165934, NM_021885, XM_006498930	177	44	29775	19.1159	0.136602	0.0489566	0.0485571
